# Supplementary material for: An accelerated human in-vitro aging model mimics in-vivo aging and facilitates dynamic testing of anti-aging compounds
Source: Research Square preprint supplement (doi:10.21203/rs.3.rs-6173768/v1), 2025-03-28
Supplement: Supplementary file 1 [file 2f4bab0497d48ced9ee278c3.xlsx]

## Sheet: ClueGO_aging
CLUEGO PATHWAYS IN-VITRO AGING
upregulated_genes
ID	Term	Term PValue	Nr. Genes	%Genes Cluster #1	%Genes Cluster #2	%Genes Cluster #1.adjusted.to.input.list.size	%Genes Cluster #2.adjusted.to.input.list.size	Associated Genes Found
KEGG:05204	Chemical carcinogenesis	0.049	11	46.1538	53.8462	37.1893	62.8107	[ALDH3A1, CHRNA7, CYP1A1, CYP2A6, GSTA4, GSTM3, GSTM4, GSTP1, HSD11B1L, MGST3, SULT1A1]
KEGG:03010	Ribosome	2.50348e-05	27	51.8519	48.1481	42.6574	57.3426	[FAU, MRPL12, MRPL2, MRPL27, MRPL28, MRPL33, MRPL34, MRPS11, RPL11, RPL13A, RPL17, RPL18, RPL19, RPL21, RPL30, RPL34, RPL35, RPL36, RPLP1, RPLP2, RPS15, RPS15A, RPS19, RPS20, RPS25, RPS27, RPS28]
KEGG:05171	Coronavirus disease	0.000385632	32	53.125	46.875	43.9107	56.0893	[C2, FAU, FOS, IFNA5, IFNA8, IRF3, ISG15, JUN, MX2, NFKBIB, PIK3R2, PLCG2, RPL11, RPL13A, RPL17, RPL18, RPL19, RPL21, RPL30, RPL34, RPL35, RPL36, RPLP1, RPLP2, RPS15, RPS15A, RPS19, RPS20, RPS25, RPS27, RPS28, TLR2]
KEGG:04913	Ovarian steroidogenesis	0.027351	8	62.5	37.5	53.516	46.484	[ACOT4, ADCY5, AKR1C3, CYP1A1, FSHR, HSD17B7, HSD3B2, LHB]
KEGG:00120	Primary bile acid biosynthesis	0.00557309	5	66.6667	33.3333	58.0103	41.9897	[ACOT8, CYP27A1, CYP39A1, CYP46A1, SLC27A5]
KEGG:04620	Toll-like receptor signaling pathway	0.0197777	14	66.6667	33.3333	58.0103	41.9897	[CD14, CD40, FOS, IFNA5, IFNA8, IRF3, IRF5, IRF7, JUN, LY96, MAP3K8, PIK3R2, TAB1, TLR2]
KEGG:04917	Prolactin signaling pathway	0.0319524	10	66.6667	33.3333	58.0103	41.9897	[CCND2, FOS, GALT, GCK, LHB, PIK3R2, SHC2, SLC2A2, SOCS1, SOCS3]
KEGG:04060	Cytokine-cytokine receptor interaction	0.0205657	32	68.5714	31.4286	60.1137	39.8863	[BMP4, CCL13, CCL14, CCL16, CCL28, CCL8, CD40, CD70, CXCL14, CXCL16, EPOR, GDF15, GDF5, IFNA5, IFNA8, IL11RA, IL17RC, IL1R2, IL20RA, IL22RA1, IL2RG, IL32, IL34, INHBB, LTBR, NODAL, THPO, TNFRSF10C, TNFRSF14, TNFRSF8, TNFSF10, TNFSF12]
KEGG:05170	Human immunodeficiency virus 1 infection	0.0421675	23	70.8333	29.1667	62.6528	37.3472	[APOBEC3H, B2M, BAD, BAX, ELOB, FOS, GNAO1, GNG7, HLA-F, IFNA5, IFNA8, IRF3, JUN, PIK3R2, PLCG2, RAC3, RNF7, SAMHD1, TAB1, TLR2, TRADD, TRAF2, WEE2]
KEGG:05166	Human T-cell leukemia virus 1 infection	0.0226473	25	71.4286	28.5714	63.3286	36.6714	[ADCY5, ANAPC2, B2M, BAX, CCNA1, CCND2, CD40, EGR1, FDPS, FOS, GPS2, HLA-F, IL1R2, IL2RG, JUN, LTBR, MAD1L1, MMP7, MSX1, MSX2, NFKB2, PIK3R2, RELB, TCF3, ZFP36]
KEGG:04932	Non-alcoholic fatty liver disease	0.003314	21	73.913	26.087	66.1839	33.8161	[BAX, CEBPA, COX5B, COX6B1, COX7A1, COX7C, FOS, JUN, NDUFA13, NDUFB1, NDUFB10, NDUFB7, NDUFS7, NDUFS8, NDUFV1, NR1H3, PIK3R2, SOCS3, TRAF2, UQCR11, UQCRQ]
KEGG:00760	Nicotinate and nicotinamide metabolism	0.0107968	7	75	25	67.4511	32.5489	[NAPRT, NMNAT3, NNMT, NT5M, SIRT4, SIRT6, SIRT7]
KEGG:04930	Type II diabetes mellitus	0.0437053	7	75	25	67.4511	32.5489	[CACNA1A, CACNA1G, GCK, PIK3R2, SLC2A2, SOCS1, SOCS3]
KEGG:05168	Herpes simplex virus 1 infection	0.0118704	22	75	25	67.4511	32.5489	[B2M, BAD, BAX, HLA-F, IFNA5, IFNA8, IRF3, IRF7, PIK3R2, SOCS3, TAB1, TLR2, TNFRSF14, TRADD, TRAF2, ZNF205, ZNF559-ZNF177, ZNF688, ZNF727, ZNF768, ZNF786, ZNF853]
KEGG:00190	Oxidative phosphorylation	0.0169004	17	76.4706	23.5294	69.1833	30.8167	[ATP5F1D, ATP5ME, ATP6V0C, COX17, COX5B, COX6B1, COX7A1, COX7C, NDUFA13, NDUFB1, NDUFB10, NDUFB7, NDUFS7, NDUFS8, NDUFV1, UQCR11, UQCRQ]
KEGG:04623	Cytosolic DNA-sensing pathway	0.0434898	9	77.7778	22.2222	69.7404	30.2596	[IFNA5, IFNA8, IRF3, IRF7, NFKBIB, POLR2E, POLR2L, POLR3G, PYCARD]
downregulated_genes
ID	Term	Term PValue	Nr. Genes	%Genes Cluster #1	%Genes Cluster #2	%Genes Cluster #1.adjusted.to.input.list.size	%Genes Cluster #2.adjusted.to.input.list.size	Associated Genes Found
KEGG:03320	PPAR signaling pathway	0.0379616	10	30	70	31.7106	68.2894	[ACADM, ADIPOQ, FABP5, ILK, LOC100509620, LPL, ME1, PCK2, PPARA, SORBS1]
KEGG:04911	Insulin secretion	0.00194739	14	33.3333	66.6667	35.1386	64.8614	[ADCY7, ADCY9, ATP1A3, ATP1B1, CCKAR, CREB3L2, KCNMA1, PCLO, PLCB1, PLCB2, PRKCA, RIMS2, SLC2A1, TRPM4]
KEGG:00770	Pantothenate and CoA biosynthesis	0.0119936	5	33.3333	66.6667	35.1386	64.8614	[ALDH1B1, BCAT1, ENPP1, ENPP3, PPCDC]
KEGG:04964	Proximal tubule bicarbonate reclamation	0.0177146	5	33.3333	66.6667	35.1386	64.8614	[ATP1A3, ATP1B1, GLS, PCK2, SLC4A4]
KEGG:04915	Estrogen signaling pathway	0.00927015	18	35	65	36.8456	63.1544	[ADCY7, ADCY9, CREB3L2, FKBP5, GNAI1, HSPA2, KRAS, KRT13, KRT15, KRT16, KRT18, KRT19, NOS3, PIK3CD, PLCB1, PLCB2, SHC4, TGFA]
KEGG:05100	Bacterial invasion of epithelial cells	1.2833e-05	17	35.2941	64.7059	37.1464	62.8536	[ACTR3, ACTR3B, ARPC1A, ARPC5, CAV2, CD2AP, CLTCL1, CTNNA1, FN1, ILK, ITGB1, MET, PIK3CD, RHOA, SEPTIN11, SHC4, VCL]
KEGG:05168	Herpes simplex virus 1 infection	2.32484e-06	11	36.3636	63.6364	38.2389	61.7611	[APAF1, CALR, EIF4EBP1, HLA-DRB5, IFNA1, PDIA3, PIK3CD, TRAF3, ZNF560, ZNF595, ZNF729]
KEGG:04961	Endocrine and other factor-regulated calcium reabsorption	0.00911414	9	36.3636	63.6364	38.2389	61.7611	[ADCY9, ATP1A3, ATP1B1, ATP2B1, CLTCL1, PLCB1, PLCB2, PRKCA, SLC8A1]
KEGG:04918	Thyroid hormone synthesis	0.0356948	10	36.3636	63.6364	38.2389	61.7611	[ADCY7, ADCY9, ATP1A3, ATP1B1, CANX, CREB3L2, HSPA5, PLCB1, PLCB2, PRKCA]
KEGG:04014	Ras signaling pathway	0.0461099	24	37.037	62.963	38.9258	61.0743	[ANGPT1, BDNF, EPHA2, ETS1, FGF1, FGF2, FGF22, FLT1, GNB4, GNG2, KRAS, MET, NGFR, PIK3CD, PLA2G10, PLCE1, PRKCA, RAP1B, RASA4B, RASSF1, RHOA, SHC4, TEK, TGFA]
KEGG:04020	Calcium signaling pathway	0.0186942	26	37.931	62.069	39.8365	60.1635	[ADCY7, ADCY9, ADORA2B, ADRA1D, ATP2B1, CASQ1, CCKAR, CXCR4, F2R, FGF1, FGF2, FGF22, FLT1, MCU, MET, MYLK, NOS3, PLCB1, PLCB2, PLCE1, PLN, PRKCA, PTGER3, SLC8A1, STIM2, VDAC1]
KEGG:04022	cGMP-PKG signaling pathway	0.00154737	23	38.4615	61.5385	40.3763	59.6237	[ADCY7, ADCY9, ADRA1D, ATP1A3, ATP1B1, ATP2B1, CREB3L2, GNAI1, IRS2, KCNMA1, MEF2C, MYLK, NOS3, NPPC, PDE5A, PLCB1, PLCB2, PLN, PPP1R12A, RHOA, ROCK1, SLC8A1, VDAC1]
KEGG:04972	Pancreatic secretion	0.00212191	16	38.8889	61.1111	40.8108	59.1892	[ADCY7, ADCY9, ATP1A3, ATP1B1, ATP2B1, BST1, CCKAR, KCNMA1, PLA2G10, PLCB1, PLCB2, PRKCA, RAP1B, RHOA, SLC12A2, SLC4A4]
KEGG:04024	cAMP signaling pathway	0.00564368	26	42.8571	57.1429	44.8313	55.1687	[ADCY7, ADCY9, ATP1A3, ATP1B1, ATP2B1, BDNF, CNGA4, CREB3L2, F2R, GNAI1, HHIP, NPY1R, PDE4D, PIK3CD, PLCE1, PLN, PPARA, PPP1R12A, PTCH1, PTGER3, RAP1B, RHOA, ROCK1, SOX9, SST, SSTR1]
KEGG:04931	Insulin resistance	0.0508597	13	42.8571	57.1429	44.8313	55.1687	[CREB3L2, GFPT1, IRS2, NOS3, PCK2, PIK3CD, PPARA, PPP1R3C, PTPRF, RPS6KA2, RPS6KA6, SLC2A1, TRIB3]
KEGG:05412	Arrhythmogenic right ventricular cardiomyopathy	0.00574061	12	43.75	56.25	45.7324	54.2676	[CACNA2D1, CDH2, CTNNA1, DSP, ITGA2, ITGA3, ITGA4, ITGA6, ITGAV, ITGB1, PKP2, SLC8A1]
KEGG:04810	Regulation of actin cytoskeleton	7.23527e-07	36	43.9024	56.0976	45.8861	54.1139	[ACTR3, ACTR3B, ARHGAP35, ARPC1A, ARPC5, CFL2, CXCR4, DIAPH3, ENAH, EZR, F2R, FGF1, FGF2, FGF22, FN1, IQGAP3, ITGA2, ITGA3, ITGA4, ITGA6, ITGAV, ITGB1, KRAS, LPAR4, MSN, MYH9, MYL10, MYLK, PFN1, PIK3CD, PPP1R12A, RDX, RHOA, ROCK1, SSH1, VCL]
KEGG:04714	Thermogenesis	0.0343954	8	44.4444	55.5556	46.4323	53.5677	[ADCY7, ADCY9, COX19, CREB3L2, KRAS, MAP3K5, RPS6KA2, RPS6KA6]
KEGG:04530	Tight junction	8.04756e-05	26	44.4444	55.5556	46.4323	53.5677	[ACTR3, ACTR3B, AMOTL2, ARPC1A, ARPC5, BVES, CD1D, CLDN1, EZR, ITGB1, MAGI1, MAP3K1, MAP3K5, MPDZ, MPP4, MSN, MYH9, PATJ, PPP2R1B, PRKCI, RAP2C, RDX, RHOA, ROCK1, TUBA1A, TUBA1B]
KEGG:04151	PI3K-Akt signaling pathway	0.000212175	43	44.898	55.102	46.889	53.111	[ANGPT1, BDNF, CCNE2, COL1A1, COL1A2, COL4A1, COL4A2, COL9A3, CREB3L2, DDIT4, EIF4EBP1, EPHA2, F2R, FGF1, FGF2, FGF22, FLT1, FN1, GNB4, GNG2, IFNA1, IL7R, ITGA2, ITGA3, ITGA4, ITGA6, ITGAV, ITGB1, KRAS, LAMA5, LPAR4, MAGI1, MET, NGFR, NOS3, PCK2, PIK3CD, PKN2, PPP2R1B, PRKCA, TEK, TGFA, THBS1]
KEGG:04261	Adrenergic signaling in cardiomyocytes	0.0337682	17	45	55	46.9917	53.0083	[ACTC1, ADCY7, ADCY9, ADRA1D, ATP1A3, ATP1B1, ATP2B1, CACNA2D1, CREB3L2, GNAI1, PLCB1, PLCB2, PLN, PPP2R1B, PRKCA, SLC8A1, TPM3]
KEGG:04670	Leukocyte transendothelial migration	0.00097411	18	45	55	46.9917	53.0083	[ARHGAP35, ARHGAP5, CLDN1, CTNNA1, CXCR4, EZR, GNAI1, ITGA4, ITGB1, MSN, MYL10, NCF4, PIK3CD, PRKCA, RAP1B, RHOA, ROCK1, VCL]
KEGG:04971	Gastric acid secretion	0.00176526	13	46.6667	53.3333	48.6669	51.3331	[ADCY7, ADCY9, ATP1A3, ATP1B1, ATP4B, EZR, GNAI1, KCNJ16, MYLK, PLCB1, PLCB2, PRKCA, SST]
KEGG:05146	Amoebiasis	0.0152631	14	47.0588	52.9412	49.0604	50.9396	[CD1D, COL1A1, COL1A2, COL4A1, COL4A2, CXCL8, FN1, HSPB1, LAMA5, PIK3CD, PLCB1, PLCB2, PRKCA, VCL]
KEGG:04071	Sphingolipid signaling pathway	0.0421506	14	47.0588	52.9412	49.0604	50.9396	[GNAI1, KRAS, MAP3K5, NOS3, PIK3CD, PLCB1, PLCB2, PPP2R1B, PRKCA, RHOA, ROCK1, S1PR1, SGPL1, SPTLC2]
KEGG:04512	ECM-receptor interaction	2.18991e-05	18	47.619	52.381	49.6221	50.3779	[AGRN, COL1A1, COL1A2, COL4A1, COL4A2, COL9A3, FN1, FRAS1, HMMR, HSPG2, ITGA2, ITGA3, ITGA4, ITGA6, ITGAV, ITGB1, LAMA5, THBS1]
KEGG:04974	Protein digestion and absorption	0.000189538	18	50	50	52.0038	47.9962	[ATP1A3, ATP1B1, COL11A1, COL12A1, COL17A1, COL1A1, COL1A2, COL22A1, COL4A1, COL4A2, COL5A1, COL5A2, COL8A1, COL9A3, SLC36A1, SLC38A2, SLC3A1, SLC8A1]
KEGG:04970	Salivary secretion	0.0116765	13	50	50	52.0038	47.9962	[ADCY7, ADCY9, ADRA1D, ATP1A3, ATP1B1, ATP2B1, BST1, KCNMA1, MUC5B, PLCB1, PLCB2, PRKCA, SLC12A2]
KEGG:05414	Dilated cardiomyopathy	0.0220068	13	50	50	52.0038	47.9962	[ACTC1, ADCY7, ADCY9, CACNA2D1, ITGA2, ITGA3, ITGA4, ITGA6, ITGAV, ITGB1, PLN, SLC8A1, TPM3]
KEGG:04510	Focal adhesion	2.19756e-07	35	50	50	52.0038	47.9962	[ARHGAP35, ARHGAP5, CAV2, COL1A1, COL1A2, COL4A1, COL4A2, COL9A3, FLNA, FLNB, FLNC, FLT1, FN1, ILK, ITGA2, ITGA3, ITGA4, ITGA6, ITGAV, ITGB1, LAMA5, MET, MYL10, MYLK, PIK3CD, PPP1R12A, PRKCA, RAP1B, RHOA, ROCK1, SHC4, THBS1, TLN1, VCL, XIAP]
KEGG:04213	Longevity regulating pathway	0.0197187	7	50	50	52.0038	47.9962	[ADCY7, ADCY9, CRYAB, HSPA2, IRS2, KRAS, PIK3CD]
KEGG:04015	Rap1 signaling pathway	1.85447e-05	32	51.4286	48.5714	53.4284	46.5716	[ADCY7, ADCY9, ADORA2B, ANGPT1, ENAH, EPHA2, F2R, FGF1, FGF2, FGF22, FLT1, GNAI1, ITGB1, KRAS, LPAR4, MAGI1, MET, NGFR, PFN1, PIK3CD, PLCB1, PLCB2, PLCE1, PRKCA, PRKCI, PRKD1, RAP1B, RHOA, SIPA1L1, TEK, THBS1, TLN1]
KEGG:04360	Axon guidance	0.000845014	25	51.8519	48.1481	53.8499	46.1501	[BMPR2, CFL2, CXCR4, ENAH, EPHA2, EPHA7, EPHB1, GNAI1, ILK, ITGB1, KRAS, MET, NEO1, NTN3, NTN4, PIK3CD, PLXNA2, PRKCA, PTCH1, RHOA, ROCK1, SEMA3D, SSH1, TRPC4, WNT5A]
KEGG:04919	Thyroid hormone signaling pathway	0.026646	15	52.9412	47.0588	54.9333	45.0667	[ATP1A3, ATP1B1, HIF1A, ITGAV, KRAS, MED13, MED13L, NOTCH1, PIK3CD, PLCB1, PLCB2, PLCE1, PLN, PRKCA, SLC2A1]
KEGG:04540	Gap junction	0.00842811	13	53.3333	46.6667	55.3229	44.6771	[ADCY7, ADCY9, CDK1, GJD2, GNAI1, KRAS, MAP3K2, PLCB1, PLCB2, PRKCA, TUBA1A, TUBA1B, TUBB]
KEGG:00230	Purine metabolism	0.049348	14	53.3333	46.6667	55.3229	44.6771	[ADCY7, ADCY9, ATIC, DCK, ENPP1, ENPP3, PAPSS2, PDE11A, PDE4D, PDE5A, PDE8A, PGM2, PRPS1, RRM2]
KEGG:05165	Human papillomavirus infection	0.000761621	39	53.4884	46.5116	55.4768	44.5232	[BCAP31, CCNA2, CCNE2, COL1A1, COL1A2, COL4A1, COL4A2, COL9A3, CREB3L2, EIF4EBP1, FN1, FZD1, FZD6, FZD7, HES1, HEY1, IFNA1, ITGA2, ITGA3, ITGA4, ITGA6, ITGAV, ITGB1, KRAS, LAMA5, MAGI1, NOTCH1, OASL, PATJ, PIK3CD, PPP2R1B, PRKCI, PTGS2, RB1, RFNG, THBS1, TRAF3, WNT2, WNT5A]
KEGG:04923	Regulation of lipolysis in adipocytes	0.0145255	9	55.5556	44.4444	57.5258	42.4742	[ADCY7, ADCY9, GNAI1, IRS2, LOC100509620, NPY1R, PIK3CD, PTGER3, PTGS2]
KEGG:04270	Vascular smooth muscle contraction	0.0235215	16	55.5556	44.4444	57.5258	42.4742	[ADCY7, ADCY9, ADORA2B, ADRA1D, CALD1, KCNMA1, MYH9, MYLK, NPPC, PLA2G10, PLCB1, PLCB2, PPP1R12A, PRKCA, RHOA, ROCK1]
KEGG:04935	Growth hormone synthesis, secretion and action	0.0421506	14	56.25	43.75	58.2126	41.7874	[ADCY7, ADCY9, CREB3L2, GNAI1, IRS2, KRAS, MAP3K1, PIK3CD, PLCB1, PLCB2, PRKCA, SHC4, SST, SSTR1]
KEGG:04926	Relaxin signaling pathway	0.00774283	17	57.1429	42.8571	59.0946	40.9054	[ADCY7, ADCY9, COL1A1, COL1A2, COL4A1, COL4A2, CREB3L2, GNAI1, GNB4, GNG2, KRAS, NOS3, PIK3CD, PLCB1, PLCB2, PRKCA, SHC4]
KEGG:04350	TGF-beta signaling pathway	0.012523	13	57.1429	42.8571	59.0946	40.9054	[BMPR1A, BMPR2, FBN1, ID2, INHBE, NEO1, NOG, PITX2, PPP2R1B, RHOA, ROCK1, SMAD9, THBS1]
KEGG:04140	Autophagy	0.0306611	6	57.1429	42.8571	59.0946	40.9054	[BNIP3, DDIT4, HIF1A, IRS2, KRAS, PIK3CD]
KEGG:05171	Coronavirus disease	0.01671	7	57.1429	42.8571	59.0946	40.9054	[CXCL8, IFNA1, MBL2, PIK3CD, PRKCA, RPS4Y2, TRAF3]
KEGG:04933	AGE-RAGE signaling pathway in diabetic complications	0.00391946	15	57.8947	42.1053	59.8363	40.1637	[COL1A1, COL1A2, COL4A1, COL4A2, CXCL8, F3, FN1, IL1A, KRAS, NOS3, PIK3CD, PLCB1, PLCB2, PLCE1, PRKCA]
KEGG:05200	Pathways in cancer	2.45179e-05	62	58.209	41.791	60.146	39.854	[ADCY7, ADCY9, APAF1, APPL1, BIRC5, BRCA2, CCNA2, CCNE2, COL4A1, COL4A2, CSF2RB, CTNNA1, CXCL8, CXCR4, ETS1, F2R, FGF1, FGF2, FGF22, FN1, FZD1, FZD6, FZD7, GNAI1, GNB4, GNG2, HES1, HEY1, HHIP, HIF1A, IFNA1, IL7R, ITGA2, ITGA3, ITGA6, ITGAV, ITGB1, KRAS, LAMA5, LPAR4, MECOM, MET, NOTCH1, PIK3CD, PLCB1, PLCB2, PRKCA, PTCH1, PTGER3, PTGS2, RAD51, RASSF1, RB1, RHOA, ROCK1, SLC2A1, TGFA, TPM3, TRAF3, …
KEGG:04611	Platelet activation	0.000404056	20	59.0909	40.9091	61.0144	38.9856	[ADCY7, ADCY9, ARHGAP35, COL1A1, COL1A2, F2R, GNAI1, ITGA2, ITGB1, MYLK, NOS3, PIK3CD, PLCB1, PLCB2, PPP1R12A, PRKCI, RAP1B, RHOA, ROCK1, TLN1]
KEGG:00564	Glycerophospholipid metabolism	0.0423409	12	61.5385	38.4615	63.4181	36.5819	[DGKH, GPAM, LCLAT1, LPCAT2, LPGAT1, LYPLA1, MBOAT2, PEMT, PLA2G10, PLD4, PLPP3, PLPP5]
KEGG:04934	Cushing syndrome	0.0238162	18	63.1579	36.8421	65.0034	34.9966	[ADCY7, ADCY9, CCNE2, CREB3L2, FZD1, FZD6, FZD7, GNAI1, HSD3B2, NCEH1, PDE11A, PDE8A, PLCB1, PLCB2, RAP1B, RB1, WNT2, WNT5A]
KEGG:05222	Small cell lung cancer	0.000450132	16	66.6667	33.3333	68.4243	31.5757	[APAF1, CCNE2, COL4A1, COL4A2, FN1, ITGA2, ITGA3, ITGA6, ITGAV, ITGB1, LAMA5, PIK3CD, PTGS2, RB1, TRAF3, XIAP]
KEGG:05231	Choline metabolism in cancer	0.0545769	8	67.7778	32.2222	69.1329	30.8671	[DGKH, EIF4EBP1, HIF1A, KRAS, LYPLA1, PIK3CD, PLPP3, PRKCA]

## Sheet: gene_list_singlecell
LTA_score	aging_clock_up	aging_clock_down
ATP5F1D	EDA2R	AAGAB
ATP5ME	CLEC2B	AAR2
ATP6V0C	SNORA31	AATF
COX17	TRIM22	ABALON
COX5B	CLK1	ABCF1
COX6B1	HIST2H2BF	ABRAXAS2
COX7A1	ZMAT3	ABT1
COX7C	ACAD11	ACOT2
NDUFA13	CD69	ACOX1
NDUFB1	CLEC1A	ACP2
NDUFB10	FMO3	ACSL3
NDUFB7	HLA-F-AS1	ACTR2
NDUFS7	ITM2A	ADO
NDUFS8	KIAA1328	ADSL
NDUFV1	LOC105372273	AFG3L2
UQCR11	NPHP3-ACAD11	AGGF1
UQCRQ	PCDHB4	AGPS
BAX	PER1	AHCYL1
CEBPA	SPRY1	AIFM1
FOS	VWCE	AIFM2
JUN	DDB2	AIMP1
NR1H3	DRD4	AKAP1
PIK3R2	FAS	AKIRIN1
SOCS3	GBP1	ALAS1
TRAF2	GRIN3B	ALDH6A1
CACNA1A	HAUS7	ALG1
CACNA1G	HBA2	ALG11
GCK	KLF2	ALG3
SLC2A2	KLHDC1	ANAPC13
SOCS1	L3MBTL4	ANKUB1
B2M	LCAT	ANP32AP1
BAD	MAN2C1	AP3B1
HLA-F	MASCRNA	AP3M1
IFNA5	NFKBID	AP5B1
IFNA8	NPIPB11	AP5M1
IRF3	PNISR	APEH
IRF7	TBX19	APEX1
TAB1	TREX2	APEX2
TLR2	TTLL3	API5
TNFRSF14	AGAP7P	AQR
TRADD	AHSA2P	ARCN1
ZNF205	ARFGAP1	ARF3
ZNF559-ZNF177	BHLHE40-AS1	ARHGAP35
ZNF688	C19orf66	ASB8
ZNF727	CASP17P	ASF1A
ZNF768	CLASRP	ASH2L
ZNF786	CLEC4A	ASNA1
ZNF853	CLIC2	ASTE1
APOBEC3H	EPHA3	ATG3
ELOB	FAM193B	ATMIN
GNAO1	FMO2	ATP2A2
GNG7	GNLY	ATP2C1
PLCG2	GUK1	ATP5F1A
RAC3	HBB	ATP5F1B
RNF7	HIST1H2BG	ATP5F1C
SAMHD1	LINC01176	ATP5PB
WEE2	LMO3	ATP5PF
ADCY5	LUC7L3	ATP6V0E1
ANAPC2	MICA	ATP6V1D
CCNA1	N4BP2L1	ATP9A
CCND2	N4BP2L2-IT2	ATPAF1
CD40	NPIPB3	ATXN1L
EGR1	NPIPB9	ATXN7L3B
FDPS	NR2F2-AS1	BABAM2
GPS2	OGFR	BAG5
IL1R2	PARP14	BCDIN3D
IL2RG	PCDHB9	BECN1
LTBR	PCNX2	BEND3
MAD1L1	PLSCR4	BLOC1S3
MMP7	RASSF1	BRCC3
MSX1	RBM6	BYSL
MSX2	RNF166	BZW2
NFKB2	RPL34	C12orf43
RELB	SLC2A3	C12orf45
TCF3	SNORA25	C12orf49
ZFP36	SNORA8	C14orf119
ALDH3A1	TMEM243	C15orf38-AP3S2
CHRNA7	TNFRSF14	C16orf91
CYP1A1	VCAM1	C17orf80
CYP2A6	AGAP11	C18orf21
GSTA4	ANKRD36	C1GALT1C1
GSTM3	ATG12	C22orf23
GSTM4	BEX5	C5orf22
GSTP1	BST2	C5orf30
HSD11B1L	CCL5	C6orf203
MGST3	CEP152	C6orf47
SULT1A1	CEP57L1	C6orf62
FAU	CEP95	C6orf89
MRPL12	CLDN5	C7orf25
MRPL2	COX20	C9orf64
MRPL27	CP	CANT1
MRPL28	DEPP1	CBLL1
MRPL33	DLL4	CCDC43
MRPL34	DPT	CCDC71
MRPS11	EXD3	CCNE1
RPL11	FBXO24	CCNJ
RPL13A	FBXW4P1	CCNY
RPL17	FER1L4	CCT2
RPL18	FMNL1	CCT5
RPL19	GBP4	CDC123
RPL21	GNRH1	CDC23
RPL30	GSTM2	CDH13
RPL34	HBA1	CEBPZ
RPL35	HLA-F	CENPBD1
RPL36	HYI	CENPN
RPLP1	INPP5D	CHAMP1
RPLP2	ITK	CHCHD1
RPS15	JUND	CHCHD7
RPS15A	KAT2A	CHD4
RPS19	KATNBL1	CHD8
RPS20	KIAA1755	CHP1
RPS25	KLRD1	CHTF8
RPS27	LOC100506142	CHUK
RPS28	LOC150776	CHURC1
ISG15	LRP5L	CIAO1
MX2	LUC7L	CIAPIN1
NFKBIB	MIR34AHG	CLCN3
ACOT8	MTF2	CLP1
CYP27A1	MTMR9LP	CLPTM1
CYP39A1	NEIL1	CLPTM1L
CYP46A1	NPIPB13	CLPX
SLC27A5	NR1D1	CLTC
ACOT4	P2RX7	CNIH4
AKR1C3	PCDHB16	CNOT1
FSHR	PCDHB2	CNOT11
HSD17B7	PFDN5	CNPPD1
HSD3B2	PLAC9	COA7
LHB	PLXDC1	COIL
GALT	POFUT2	COMMD5
SHC2	PPP4R1L	COP1
ACADM	RADX	COPB1
ACTC1	RARRES2	COPB2
ACTR3	RGS1	COPG1
ACTR3B	RHBDF1	COPG2
ADCY7	RIMKLB	COPS3
ADCY9	ROBO3	COPS4
ADIPOQ	RRP7BP	COX10
ADORA2B	SAP25	COX5A
ADRA1D	SERHL2	CPSF2
AGRN	SMG1P7	CPSF3
ALDH1B1	SNORA67	CPT2
AMOTL2	SNORD10	CRNKL1
ANGPT1	SNORD87	CSE1L
APAF1	SNX29P2	CSNK2A1
APPL1	SPATA7	CSNK2A3
ARHGAP35	SPEF2	CSTF1
ARHGAP5	SRRM1	CSTF2T
ARPC1A	TAZ	CTNNB1
ARPC5	TCIM	CTR9
ATIC	THOC1	CUL2
ATP1A3	TNFRSF10B	CUL3
ATP1B1	TNXB	CXorf56
ATP2B1	TRAF1	CYB561D1
ATP4B	TRIM73	CYCS
BCAP31	TSSC2	DAG1
BCAT1	XRCC3	DARS2
BDNF	ZNF767P	DBR1
BIRC5	ZRSR2	DCAF11
BMPR1A	ADAMTS10	DCAF7
BMPR2	AMY2B	DCLRE1A
BRCA2	ANKRD16	DCTN5
BST1	ANKRD37	DCUN1D5
BVES	ANKS3	DDB1
CACNA2D1	ANKZF1	DDX1
CALD1	ARPC4-TTLL3	DDX28
CALR	ATF3	DDX52
CANX	B2M	DHDDS
CASQ1	BCO2	DHRS7B
CAV2	BTG1	DHTKD1
CCKAR	BTN2A2	DHX32
CCNA2	C12orf57	DHX33
CCNE2	C17orf67	DHX8
CD1D	CACNB1	DLAT
CD2AP	CCDC84	DLD
CDH2	CDKN2A	DNAAF2
CDK1	CENPT	DNAJC14
CFL2	CEP112	DNAJC30
CLDN1	CLEC2D	DOLK
CLTCL1	CROCC	DPH2
COL11A1	CSNK1E	DPH3
COL12A1	D2HGDH	DRG1
COL17A1	DBP	DSG2
COL1A1	DUXAP8	DSTYK
COL1A2	DXO	E2F6
COL22A1	EVC2	EBNA1BP2
COL4A1	EXOSC10	EDC3
COL4A2	EYA4	EEF1AKNMT
COL5A1	FAM27E3	EEF2KMT
COL5A2	FBXO17	EHD4
COL8A1	FES	EID2
COL9A3	FGF14	EIF1AD
COX19	FGF17	EIF2A
CREB3L2	FLT3LG	EIF2S1
CSF2RB	GBP1P1	EIF4E2
CTNNA1	GBP5	EIF4H
CXCL8	GDF15	EIF5
CXCR4	HMBOX1	ELAC1
DCK	HSPA7	ELOA
DDIT4	IER5L	ELOA-AS1
DGKH	IKBKB	ELP3
DIAPH3	IL15	EMC1
DSP	IRF2BP2	EMC3
EIF4EBP1	ISLR	EMC6
ENAH	KHDC4	ENC1
ENPP1	KLRA1P	EPB41L4B
ENPP3	LEMD2	EPRS
EPHA2	LINC00924	ERAL1
EPHA7	LINC01578	ERC1
EPHB1	LOC101927164	ERLIN2
ETS1	LOC101929718	EXO5
EZR	LOC155060	EXOC8
F2R	LRRC70	EXOSC4
F3	LRRK2	FABP3
FABP5	LSMEM1	FADD
FBN1	LTBP3	FAF2
FGF1	LTBP4	FAHD1
FGF2	LUM	FAM136A
FGF22	MAPK8IP3	FAM166A
FKBP5	MATN1-AS1	FAM168B
FLNA	MEF2B	FAM32A
FLNB	MEG3	FARSA
FLNC	MFAP4	FASTKD2
FLT1	MMP23A	FASTKD3
FN1	MMP23B	FASTKD5
FRAS1	MS4A14	FBXL18
FZD1	MX2	FBXO38
FZD6	MYO15B	FBXO45
FZD7	NPIPB6	FCF1
GFPT1	OVGP1	FECH
GJD2	PCDH9	FEM1A
GLS	PCDHA1	FEN1
GNAI1	PCDHA10	FH
GNB4	PCDHA11	FITM2
GNG2	PCDHA2	FKBPL
GPAM	PCDHA3	FRG1BP
HES1	PCDHA5	FTSJ3
HEY1	PCDHA6	FZD5
HHIP	PCDHA8	G3BP2
HIF1A	PCDHA9	GART
HLA-DRB5	PCDHAC1	GATB
HMMR	PDGFRL	GCC1
HSD3B2	PHLDA3	GCDH
HSPA2	PI16	GCOM1
HSPA5	PLCG1	GDE1
HSPB1	PLXNA3	GDI2
HSPG2	PML	GEMIN6
ID2	PMS2P3	GEMIN7
IFNA1	PRKRA-AS1	GFM1
IL1A	PRNCR1	GHITM
IL7R	PYHIN1	GLRX3
ILK	RAB24	GLYR1
INHBE	RAB3IL1	GMPR2
IQGAP3	RASSF8-AS1	GNE
IRS2	REC8	GNPNAT1
ITGA2	RLF	GNRHR2
ITGA3	RORA-AS1	GOSR1
ITGA4	RPL13	GPATCH3
ITGA6	RPL35A	GPATCH4
ITGAV	RPS19	GPHN
ITGB1	RRN3P2	GPN1
KCNJ16	SAFB2	GPN2
KCNMA1	SDHAP1	GRSF1
KRAS	SEPT7P2	GRWD1
KRT13	SFRP2	GSK3B
KRT15	SHISA3	GSPT1
KRT16	SLC15A3	GSPT2
KRT18	SLC25A25-AS1	GSR
KRT19	SNORA18	GTF2E1
LAMA5	SNORD5	GTF3C4
LCLAT1	SNORD58C	GTF3C6
LOC100509620	SPATA18	H1F0
LPAR4	SPATA5	H2AFY2
LPCAT2	SRGAP2C	HACD2
LPGAT1	SUGP2	HADH
LPL	TAF1D	HADHB
LYPLA1	THAP9-AS1	HARBI1
MAGI1	TMC8	HAT1
MAP3K1	TNXA	HCCS
MAP3K2	TPT1-AS1	HDAC2
MAP3K5	TRAF3IP2-AS1	HENMT1
MBL2	TSIX	HIF1AN
MBOAT2	TVP23C	HK1
MCU	UCKL1	HMGCR
ME1	WDFY3-AS2	HMGN4
MECOM	WDPCP	HMOX2
MED13	XIST	HNRNPUL2
MED13L	ZAP70	HNRNPUL2-BSCL2
MEF2C	ZC3H6	HOMEZ
MET	ZNF276	HPS6
MPDZ	ZNF519	HSPA4
MPP4	ZNF621	HYLS1
MSN	ZNF76	IARS2
MUC5B	ZNF83	ICMT
MYH9	ZNF841	IDI2
MYL10	ZNF876P	ILF2
MYLK	2024-09-01	IMMT
NCEH1	ABCA6	INKA2
NCF4	ABCA8	INTS5
NEO1	ABCD4	IPO4
NGFR	ACAP1	IPP
NOG	ACAP3	JAGN1
NOS3	ACBD4	JAK1
NOTCH1	ACSS3	JMJD4
NPPC	ADAMTSL2	JPT2
NPY1R	ADM	KBTBD4
NTN3	ADORA2A	KBTBD6
NTN4	AGAP3	KCNRG
OASL	AKAP17A	KCTD2
PAPSS2	AKAP8L	KCTD20
PATJ	ANGPTL6	KCTD21-AS1
PCK2	ANKDD1A	KDM3B
PDE11A	ANKRD13D	KIAA0100
PDE4D	ANKRD36B	KIAA0391
PDE5A	ANXA2R	KIAA2013
PDE8A	ARHGAP15	KIF1BP
PDIA3	ARHGEF7	KIF1C
PEMT	ASPN	KLHDC10
PFN1	ATG16L2	KLHL11
PGM2	ATG4B	KLHL18
PIK3CD	ATG7	KNSTRN
PITX2	ATM	KPNA2
PKN2	ATXN7	KPNA4
PKP2	AZIN2	KTI12
PLA2G10	BBC3	LANCL2
PLCB1	BOC	LARP1
PLCB2	C16orf89	LBHD1
PLCE1	CAPN12	LCLAT1
PLD4	CAPRIN2	LCMT2
PLN	CCDC154	LINC01963
PLPP3	CCNL1	LINC02603
PLPP5	CCNL2	LLPH
PLXNA2	CEP290	LMNB1
PPARA	CEP44	LOC100129931
PPCDC	CFAP45	LOC100507642
PPP1R12A	CHIC1	LOC101928525
PPP1R3C	CHORDC1	LOC101930085
PPP2R1B	CHRD	LOC105371730
PRKCA	CLDN15	LRRC47
PRKCI	CNIH3	LRRC8D
PRKD1	CNOT3	LUZP1
PRPS1	COL16A1	MAD2L1BP
PTCH1	COL21A1	MAIP1
PTGER3	CPLX1	MAK16
PTGS2	CRIP1	MANSC1
PTPRF	CROCCP3	MAP10
RAD51	CYP21A2	MAPK1
RAP1B	CYTIP	MARS2
RAP2C	DDIT3	MCAT
RASA4B	DIP2A	MCM3
RASSF1	DIRAS3	MCTS1
RB1	DLL1	MDH1
RDX	DOCK6	MDH2
RFNG	DUSP1	ME2
RHOA	EGFL8	MEAK7
ROCK1	ENGASE	MED1
RPS4Y2	ENO2	MED18
RPS6KA2	EPOR	MED19
RPS6KA6	EZH1	MED20
RRM2	FBLN7	MED4-AS1
S1PR1	FCHSD1	METAP2
SEMA3D	GAS6	METTL2A
SEPTIN11	GDI1	METTL2B
SGPL1	GGT7	MFAP1
SHC4	GIMAP5	MFAP3
SIPA1L1	GOLGA8N	MFSD5
SLC12A2	GPSM1	MIA3
SLC2A1	HIST1H2BD	MIEF1
SLC36A1	HIST2H2AA3	MIPEP
SLC38A2	HIST2H2AA4	MIR1184-1
SLC3A1	HLA-C	MIR1184-2
SLC4A4	HLA-H	MIR3661
SLC8A1	HNRNPA3	MLEC
SMAD9	HTRA1	MLYCD
SORBS1	IFI44	MMAA
SPTLC2	IGF2	MMADHC
SSH1	INVS	MMGT1
SST	IRF3	MOB4
SSTR1	ITGA10	MOCS3
STIM2	ITGBL1	MON1B
TEK	JDP2	MPHOSPH10
TGFA	JUN	MRM2
THBS1	KLF3-AS1	MRM3
TLN1	LAG3	MRPL13
TPM3	LINC00894	MRPL15
TRAF3	LINC00899	MRPL20-AS1
TRIB3	LINC00960	MRPL3
TRPC4	LOC100128108	MRPL35
TUBA1A	LOC100130691	MRPL36
TUBA1B	LOC100289561	MRPL44
TUBB	LOC100507006	MRPL45
VCL	LOC101929709	MRPL46
VDAC1	LOC171391	MRPS10
WNT2	LOC541473	MRPS11
WNT5A	LOC729603	MRPS12
XIAP	LRRC37B	MRPS16
ZNF560	LSP1	MRPS17
ZNF595	MAATS1	MRPS18B
ZNF729	MALAT1	MRPS18C
	MIB2	MRPS2
	MOV10	MRPS22
	MPZL2	MRPS23
	MRC2	MRPS33
	MUC20	MRPS35
	MYBL1	MSANTD4
	MYCT1	MSL3P1
	NAPB	MSMP
	NDUFA4L2	MSRB1
	NEGR1	MTCH2
	NENF	MTF1
	NME3	MTIF2
	NOX4	MTOR
	NPHP3	MTRNR2L8
	NR4A2	MTRR
	NSUN6	MUL1
	ODF2L	MUT
	OSBPL7	MYORG
	P3H1	NAA20
	PARP10	NACC1
	PARP12	NANP
	PARP2	NARS
	PATL2	NCKAP1
	PAXBP1	NCOA4
	PAXX	NCSTN
	PCDHA12	NDC1
	PCDHA13	NDUFAB1
	PCDHA4	NDUFAF1
	PCDHA7	NDUFB5
	PCDHAC2	NDUFB6
	PCDHB10	NDUFC2
	PCDHB7	NDUFS1
	PCOLCE	NEFH
	PDCD1LG2	NFU1
	PDZD7	NHLRC1
	PHC1	NIF3L1
	PHF1	NIP7
	PJVK	NIPA2
	PNN	NKAPL
	POU6F1	NLN
	PPP1R32	NLRX1
	PRDM5	NME6
	PRKD2	NMNAT1
	PRPF39	NOA1
	PRSS53	NOL11
	PTCHD4	NOMO1
	RASA2	NOMO3
	RDM1P5	NOP14
	RGS11	NOP9
	RICTOR	NRBF2
	RNPC3	NRIP1
	RP9P	NSF
	RPL18	NSUN4
	SDCCAG8	NUDT19
	SEMA3F-AS1	NUP37
	SETBP1	NUP62
	SFI1	NUP88
	SFSWAP	NUP93
	SIN3B	ODC1
	SLC12A4	OGDH
	SLC38A6	OPA3
	SNHG6	ORMDL2
	SNORA32	OSBP
	SNORD104	OSBPL11
	SNRNP70	PABPC4-AS1
	SP100	PAICS
	SRGAP2	PAIP2
	SRGAP2B	PAK1IP1
	SRSF5	PARP1
	SSPN	PARS2
	STC1	PBDC1
	STRADA	PDCD2
	STX4	PDCD6
	TCF4	PDE12
	TCIRG1	PDHB
	TGFB1	PDHX
	TMEM63A	PEX11A
	TRAF5	PEX11B
	TRAPPC2	PGAM1
	TSNAXIP1	PGAM4
	TTC14	PGBD4
	TUBE1	PGRMC2
	UBA7	PHAX
	UBAP1L	PHB
	WISP3	PHF23
	ZFP36L1	PIGM
	ZGLP1	PIGS
	ZNF160	PIK3R4
	ZNF445	PIP4K2C
	ZNF511	PIPSL
	ZNF540	PLAA
	ZNF571	PLAGL2
	ZNF692	PLEKHB2
	2024-09-08	PLPP6
	ABCA10	PLRG1
	ACD	PNO1
	ACP6	POLE3
	ADORA2A-AS1	POLR1A
	AEBP1	POLR1B
	AGAP12P	POLR2D
	AGAP6	POLR3B
	ALDH1A1	POP1
	AMT	POP4
	APOBEC3D	PPCS
	APOD	PPIL1
	APOL3	PPM1G
	ARAP2	PPP1CA
	ARAP3	PPP1R3D
	ARHGAP21	PPP1R8
	ARHGAP22	PPP6C
	ARHGAP33	PRDM4
	ARRDC2	PREP
	ATP10D	PRKAG1
	ATXN2L	PRKAR2A
	ATXN3	PRMT5
	B3GNTL1	PRMT5-AS1
	BGN	PRMT6
	BHLHE22	PRPF19
	BHLHE40	PRPF6
	BHLHE41	PSEN1
	BTN3A1	PSKH1
	C1orf35	PSMA1
	C1QTNF12	PSMA2
	C1QTNF5	PSMA4
	C1S	PSMA5
	C2	PSMB2
	C20orf203	PSMB5
	C2CD4B	PSMB6
	C3orf35	PSMC2
	C7	PSMD1
	C8orf31	PSMD12
	CAHM	PSMD14
	CARD11	PSMD7
	CBLN3	PSMD8
	CCDC102A	PSME3
	CCDC146	PTRH2
	CCDC30	PUF60
	CCS	QRSL1
	CD247	RAB7A
	CD40	RABL3
	CD7	RALGAPB
	CDC37	RAMAC
	CDC42EP5	RAN
	CDHR3	RANBP6
	CDK11A	RBBP4
	CDK17	RBM12
	CDK5RAP3	RBM15B
	CDK9	REST
	CDKN1B	RETREG2
	CELSR3	RETSAT
	CEP131	RFT1
	CEP57	RGP1
	CFAP44	RIC8A
	CFAP70	RIOK2
	CMTM3	RIOX1
	COA1	RIPK1
	COL13A1	RNF121
	COLEC11	RNF123
	COLGALT2	RNF139
	CRABP2	RNF20
	CREBRF	RNF26
	CRMP1	RNF6
	CTDSPL2	RNLS
	CXCL12	RPA1
	CXCL14	RPL7L1
	CXCL9	RPP25L
	CXCR4	RPUSD2
	CYGB	RRAGA
	CYR61	RRM1
	CYS1	RRP15
	DCN	RRS1
	DDAH2	RTCB
	DENND4B	RTL10
	DGKE	RTL6
	DMTF1	RTN3
	DPH7	RUNDC1
	DPY19L1P1	RUVBL1
	DSCAML1	SACM1L
	DUBR	SCAMP3
	DUSP2	SCO1
	DZIP1	SDAD1
	E2F5	SEC23B
	ECHDC2	SENP3
	ECM1	SEPHS2
	EFEMP2	SF3B4
	EFS	SFT2D3
	ELMO1	SHOC2
	EMP3	SLC25A20
	EPM2AIP1	SLC25A23
	ERAP2	SLC25A44
	F2R	SLC25A5-AS1
	FAM111A	SLC27A4
	FAM153B	SLC30A6
	FAM229A	SLC31A1
	FAM50A	SLC35A2
	FAM66C	SLC35A4
	FANCL	SLC35C1
	FBLN5	SLC35E1
	FBXO44	SLC39A9
	FBXW7	SLC4A1AP
	FGFR1OP2	SMARCA5
	FKBP8	SMC3
	FLYWCH1	SMCR8
	FMNL2	SMG8
	FOXD2-AS1	SMU1
	FTX	SNAP29
	FXYD2	SND1
	FYN	SNIP1
	GABBR1	SNRPB2
	GAK	SNX2
	GATAD1	SNX4
	GATAD2B	SOCS6
	GDPD3	SOCS7
	GEM	SPATA2
	GLT8D2	SPATA21
	GRAMD2B	SPRTN
	GRASP	SPTY2D1
	GSDMD	SRP72
	GUSBP11	SRPRB
	HACE1	SRR
	HDAC7	SRRD
	HERC2P3	STARD7
	HGF	STOML2
	HIST2H2BE	STRAP
	HLA-B	STRBP
	HLA-DMA	SUPT16H
	HLA-DPB1	SYNCRIP
	HLX	TACO1
	HNRNPH1	TATDN1
	HOTAIRM1	TATDN3
	HRAT92	TAX1BP1
	HSD17B7	TBC1D3P1-DHX40P1
	HSD17B7P2	TBCC
	HSF4	TES
	HSPA6	TEX261
	IDUA	TFAM
	IFI27L2	TFB2M
	IFITM1	TFCP2
	IGIP	TFIP11
	IL10RA	TGFBRAP1
	IL17D	THAP11
	INO80B-WBP1	THUMPD3
	INPP5E	TIGD6
	INS-IGF2	TIMM17A
	ISG20	TIMM23
	ITGB2-AS1	TIPRL
	JMJD7-PLA2G4B	TIRAP
	KAZN	TM2D2
	KIF7	TM9SF1
	KLC1	TM9SF2
	KLF6	TMCO1
	KMT5C	TMEM102
	KPNA5	TMEM127
	LENG8	TMEM164
	LENG8-AS1	TMEM177
	LIME1	TMEM184C
	LINC00115	TMEM185B
	LINC00869	TMEM186
	LINC00893	TMEM192
	LINC01315	TMEM199
	LINC01481	TMEM209
	LINC01534	TMEM251
	LINC02609	TMEM53
	LINC02614	TMX2
	LINC02615	TNPO3
	LOC101928307	TOE1
	LOC730098	TOMM70
	LRRC37A3	TOR1A
	LRRC75B	TOR1B
	LRRN4CL	TP53RK
	LTBP2	TPMT
	LY6G5B	TRAPPC4
	MAFK	TRIM4
	MAP3K7CL	TRIP12
	MAP4K5	TRMT10C
	MAX	TRMT12
	MDK	TRMT5
	MEGF6	TRMT6
	MEI1	TRUB2
	METTL17	TSFM
	MFAP2	TSN
	MFRP	TSPYL1
	MGP	TSPYL5
	MHENCR	TSR1
	MICALL2	TST
	MICU3	TTC1
	MIR100HG	TTC30A
	MIR6891	TTC30B
	MITD1	TTI1
	MMP2	TTI2
	MMRN2	TTLL12
	MNS1	TUBA1C
	MORC4	TUBB1
	MS4A7	TUBB4B
	MXD1	TUFM
	MXRA8	TWISTNB
	MYO15A	TWNK
	MYO9B	TXNDC9
	NAALAD2	UBE2L3
	NACA	UBE3C
	NAT9	UBLCP1
	NCKIPSD	UBQLN2
	NKTR	UMPS
	NLRC5	UNC119B
	NPDC1	UQCRFS1
	NPRL2	URB2
	NR4A1	USP10
	NSUN5P2	USP19
	NTM	USP38
	NUDT17	USP5
	OSGEP	USP9X
	OXER1	UTP11
	P3H3	UTP14A
	PABPN1	UTP14C
	PAGR1	UTP15
	PAN2	UTP23
	PCDHB14	UTP25
	PDE1A	UTP3
	PDE1C	VAC14
	PHF11	VANGL1
	PIDD1	VAPB
	PIK3IP1	VCP
	PLA2G4B	VCPIP1
	PLEKHA1	VIRMA
	PLEKHA8	VKORC1L1
	PLGLB1	VPS18
	PLGLB2	VPS25
	PLK2	VPS26C
	PODN	VPS33A
	POLM	VPS35
	POM121L9P	VPS4B
	POMT1	VTA1
	POU2F1	WAPL
	POU5F1P3	WASHC5
	PPIEL	WDR12
	PPOX	WDR3
	PPP3CC	WDR46
	PREX2	WDR82
	PRRX1	WSB2
	PSMB9	XRCC5
	PTGFR	XRCC6
	PTN	XRN2
	PTOV1-AS2	YIPF5
	PVT1	YKT6
	PXN-AS1	YTHDF2
	QTRT1	YTHDF3
	RAPGEF3	YWHAB
	RAPGEF5	YWHAG
	RASAL3	ZBED1
	RASGRF2	ZBTB11-AS1
	RASGRP1	ZBTB24
	RBM33	ZBTB3
	RBM5	ZBTB39
	RBPJ	ZBTB42
	RFX3	ZBTB6
	RHPN1	ZBTB9
	RNF112	ZC3H13
	RPL10	ZC3H4
	RPL21	ZC3HC1
	RPL35	ZCCHC3
	RPS11	ZDHHC5
	RPS15	ZFP3
	RPS6	ZIK1
	SCARF2	ZMAT2
	SCN2A	ZNF134
	SDR39U1	ZNF200
	SETD5	ZNF213
	SH2D2A	ZNF239
	SH3GL1P1	ZNF268
	SLC25A29	ZNF281
	SLC26A6	ZNF408
	SLC6A1	ZNF41
	SLCO4A1	ZNF490
	SLFN11	ZNF518B
	SMG9	ZNF549
	SMPD3	ZNF551
	SMPD4	ZNF587B
	SNORD73A	ZNF622
	SNRPA1	ZNF629
	SOX17	ZNF669
	SP140	ZNF689
	SP140L	ZNF696
	SPG7	ZNF697
	SRSF1	ZNF747
	SSBP4	ZNF778
	STARD10	ZNF830
	STARD3	ZNHIT2
	STEAP2	ZSCAN29
	STX16	ZSWIM1
	SUMO2	ZW10
	TAS2R20
	TBX2-AS1
	TCP10L
	TCTE3
	TENM1
	TENT4A
	THBS3
	THUMPD2
	TIAL1
	TMEM116
	TMEM176A
	TMEM200B
	TNFAIP3
	TNFRSF14-AS1
	TOP3B
	TPM3P9
	TRO
	TSHZ2
	TSHZ3
	TULP3
	TVP23C-CDRT4
	TYK2
	UBC
	UBE2B
	USP36
	VEGFC
	VGLL4
	WNT11
	WSB1
	YPEL3
	ZMYND10
	ZNF224
	ZNF251
	ZNF266
	ZNF483
	ZNF676
	ZNF680
	ZNF720
	ZNF789
	ZNF91

## Sheet: Sheet1
LTA_score	ATP5F1D, ATP5ME, ATP6V0C, COX17, COX5B, COX6B1, COX7A1, COX7C, NDUFA13, NDUFB1, NDUFB10, NDUFB7, NDUFS7, NDUFS8, NDUFV1, UQCR11, UQCRQ, BAX, CEBPA, FOS, JUN, NR1H3, PIK3R2, SOCS3, TRAF2, CACNA1A, CACNA1G, GCK, SLC2A2, SOCS1, B2M, BAD, HLA-F, IFNA5, IFNA8, IRF3, IRF7, TAB1, TLR2, TNFRSF14, TRADD, ZNF205, ZNF559-ZNF177, ZNF688, ZNF727, ZNF768, ZNF786, ZNF853, APOBEC3H, ELOB, GNAO1, GNG7, PLCG2, RAC…
aging_clock_up	EDA2R, CLEC2B, SNORA31, TRIM22, CLK1, HIST2H2BF, ZMAT3, ACAD11, CD69, CLEC1A, FMO3, HLA-F-AS1, ITM2A, KIAA1328, LOC105372273, NPHP3-ACAD11, PCDHB4, PER1, SPRY1, VWCE, DDB2, DRD4, FAS, GBP1, GRIN3B, HAUS7, HBA2, KLF2, KLHDC1, L3MBTL4, LCAT, MAN2C1, MASCRNA, NFKBID, NPIPB11, PNISR, TBX19, TREX2, TTLL3, AGAP7P, AHSA2P, ARFGAP1, BHLHE40-AS1, C19orf66, CASP17P, CLASRP, CLEC4A, CLIC2, EPHA3, FAM193B, F…
aging_clock_down	AAGAB, AAR2, AATF, ABALON, ABCF1, ABRAXAS2, ABT1, ACOT2, ACOX1, ACP2, ACSL3, ACTR2, ADO, ADSL, AFG3L2, AGGF1, AGPS, AHCYL1, AIFM1, AIFM2, AIMP1, AKAP1, AKIRIN1, ALAS1, ALDH6A1, ALG1, ALG11, ALG3, ANAPC13, ANKUB1, ANP32AP1, AP3B1, AP3M1, AP5B1, AP5M1, APEH, APEX1, APEX2, API5, AQR, ARCN1, ARF3, ARHGAP35, ASB8, ASF1A, ASH2L, ASNA1, ASTE1, ATG3, ATMIN, ATP2A2, ATP2C1, ATP5F1A, ATP5F1B, ATP5F1C, ATP5…
